# Supplementary material
Source: PubMed Central journal article supplement (PMC4964942)
Supplement: NIHMS68417-supplement-Table_1.pdf [file NIHMS68417-supplement-Table_1.pdf]

## Supplementary table 1

## Primers used for QPCR analysis (Fig 3)

| Gene   | sense                         | antisense                    |
|--------|-------------------------------|------------------------------|
| Sox2   | 5'-TCCAAAACTAATCACAACAATCG-3' | 5'-GAAGTGCAATTGGGATGAAAA-3'  |
| Id2    | 5'-GACAGAACCAGGCGTCCA-3'      | 5'-AGCTCAGAAGGGAATTCAGATG-3' |
| Oct6   | 5'-AGCACTCGGACGAGGATG-3'      | 5'-TTGAACTGCTTGGCGAACT-3'    |
| Ngfr   | 5'-CGGTGTGCGAGGACACTGAGC-3'   | 5'TGGGTGCTGGGTGTTGTGACG-3'   |
| c-jun  | 5'-CTGAGTGTGCGAGAGACAGC-3'    | 5'-CCAAGTCCGTCCGTCTGT-3'     |
| Krox20 | 5'-AATGGCTTGGGACTGACTTG-3'    | 5'-GCCAGAGAAACCTCCATTCA-3'   |
| Mpz    | 5'-ACTTGGCCTTCCCCTCTCTC-3'    | 5'-GGGCCACCAGAAGGTAGG-3'     |
| Hey2   | 5'-GTGGGGAGCGAGAACAATTA-3'    | 5'-GTTGTCGGTGAATTGGACCT-3'   |
| Rpl8   | 5'-CAACAGCGCCGTTGTTGGT-3'     | 5'-CAGCCTTTAAGATAGGCTTGTC-3' |
| Ednrb  | 5'-TCAGAAAAACAGCCTTCATGC-3'   | 5'-GCGGCAAGCAGAAGTAGAAA-3'   |
| Gfap   | 5'-ACAGACTTTCTCCAACCTCCAG-3'  | 5'-CCTTCTGACACGGATTTGGT-3'   |
| Cdh2   | 5'-CCTCCATGTGCCGATAG-3'       | 5'-CACCAGAAGCCTCCACAGAC-3'   |
| Pmp2   | 5'-AGAGACAGCCATAAGGAGAAGC-3'  | 5'-TGCAGACCACACCCTTCAT-3'    |
| Cnp1   | 5'-CGCTGGGGCAGAGAATA-3'       | 5'-AAGGCCTTGCATACGATCT-3'    |
| S100b  | 5'-AACAACGAGCTCTCTCACTTCC-3'  | 5'-CTCCATCACTTTGTCCACCA-3'   |
| ErbB3  | 5'-CGAGAACTGCACCCAAGG-3'      | 5'-TCTGCTTGGCCTAAACAGTCT-3'  |
| Cdh1   | 5'-CAGAATGACAACAGGCCAGA-3'    | 5'-TTCATCACGGAGTTTCTG-3'     |
| Itga4  | 5'-ACTCCCCACAGGCCTTTATT-3'    | 5'-TCAGTCACTTCGCAGTTTATTG-3' |

## Primers used for QPCR analysis (Suppl. Fig 2)

| Assay | sense                         | antisense                     |
|-------|-------------------------------|-------------------------------|
| #1    | 5'-CTTCTCTCCGCTGCACC-3'       | 5'-GCTCAGAACTCCCTCCCA-3'      |
| #2    | 5'-CAGCCCAAATGCCACCTC-3'      | 5'-CTTGGGGACGAAAGCATCAAC-3'   |
| #3    | 5'-CTTTGGATGGGGCAGTTG-3'      | 5'-CTGCCATGTAGCTGACTGT-3'     |
| #4    | 5'-GGATGAGCGCAGAAACAATGG-3'   | 5'-GGATACATAAGGGTGGATGGGG-3'  |
| #5    | 5'-TGCAGAGAGAGACAGACTTAAA-3'  | 5'-GTTTTGTAAGTTTGCCAGATCG-3'  |
| #6    | 5'-CTAATCCAACAATGCACGGGGA-3'  | 5'-TTTTCACCTGCCAGCTCC-3'      |
| #7    | 5'-TCCATCCCTTAGACTTAACTACA-3' | 5'-CAACGCCTATCAAATGTTTCCCA-3' |
| #8    | 5'-CAGAATAATGCACCTCACCCAC-3'  | 5'-TGACGCTTATTTACCAGACAGAG-3' |
| #9    | 5'-GCTTCCTGAGTATTTCTGTCTT-3'  | 5'-ATCTCTCTGTGCCCTGTAGATC-3'  |
| neg   | 5'-TGCCAGGTGACAGGGTCTCT-3'    | 5'-AGAGGCCTTGCCCTCAGAT-3'     |
